# Supplementary material
Source: publisher site journal article supplement (https://www.dovepress.com/get_supplementary_file.php?f=260129.docx)
Supplement: Supplementary file 1 [file get_supplementary_file.php]

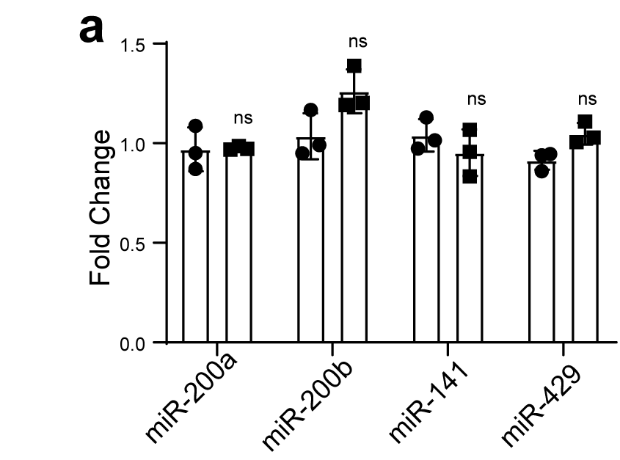


**Supplementary Figure 1**

**a,** RT-qPCR analysis of indicated miRNAs in SW620 cells treated with DMSO or Curcumin. ns: not significant.


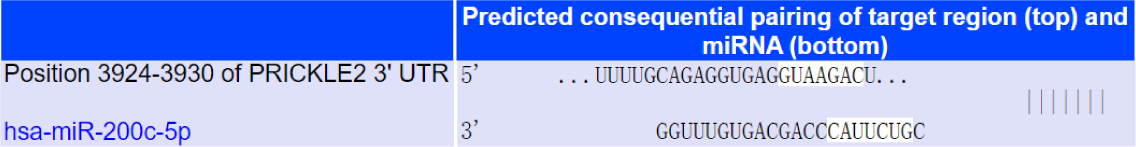


**Supplementary Figure 2**

**a,** Schematic representation of the *EPM5* 3′UTR indicating the miR-200c seed-matching sequences. Figure obtained from TargetScan ([http://www.targetscan.org](http://www.targetscan.org/vert_72/)).

**Supplementary Figure 3**

**a,** Heatmap of mRNA expression correlation (Pearson) between EMT related genes and *EPM5* from the indicated genesets.

**b,** The association of *EPM5* with EMT hallmark gene signature was analyzed by GSEA.

**c,** *EPM5* mRNA expression in CRC patients samples belongs to the indicated four CMS subtypes

**Supplementary Figure 4**

**a,** The association of EPM5 with HALLMARK_TGF_BETA_SIGNALING gene signature obtained from the https://www.gsea-msigdb.org/gsea/msigdb/genesets.jsp

**b,** The association of EPM5 with KEGG_TGF_BETA_SIGNALING_PATHWAY gene signature.
